# Supplementary material
Source: publisher figshare collection journal article supplement (https://frontiersin.figshare.com/ndownloader/files/13001684)
Supplement: Supplementary file [file 13001684]

## *Supplementary Material*

# **The diversity of mammalian hemoproteins and microbial heme scavengers is shaped by an arms race for iron piracy**

Alessandra Mozzi\*, Diego Forni, Mario Clerici, Rachele Cagliani, Manuela Sironi

\* Correspondence: Alessandra Mozzi: [alessandra.mozzi@bp.lnf.it](mailto:alessandra.mozzi@bp.lnf.it)

## **Supplementary Tables**

**Supplementary Table S5.** List of *Neisseria gonorrhoeae* strains

**Supplementary Table S5. List of *Neisseria gonorrhoeae* strains**

| Organism/Strain                             | Assembly        | Accession ID  |
|---------------------------------------------|-----------------|---------------|
| <i>Neisseria gonorrhoeae</i> 1291           | GCA_000156755.1 | ABZF01        |
| <i>Neisseria gonorrhoeae</i> 32867          | GCA_001661085.1 | NZ_CP016015.1 |
| <i>Neisseria gonorrhoeae</i> 34530          | GCA_001661115.1 | NZ_CP016016.1 |
| <i>Neisseria gonorrhoeae</i> 35/02          | GCA_001047275.1 | NZ_CP012028.1 |
| <i>Neisseria gonorrhoeae</i> ALB_2011_01-02 | GCA_001025905.1 | ATQE01        |
| <i>Neisseria gonorrhoeae</i> ALB_2011_03_03 | GCA_001026275.1 | ATQB01        |
| <i>Neisseria gonorrhoeae</i> ALB_2011_04_03 | GCA_001025915.1 | ATQC01        |
| <i>Neisseria gonorrhoeae</i> ATCC 49226     | GCA_001997645.1 | MTGL01        |
| <i>Neisseria gonorrhoeae</i> ATL_2011_01_03 | GCA_001025585.1 | ATQD01        |
| <i>Neisseria gonorrhoeae</i> ATL_2011_01_05 | GCA_001025945.1 | ATQF01        |
| <i>Neisseria gonorrhoeae</i> ATL_2011_01_08 | GCA_001025955.1 | ATQG01        |
| <i>Neisseria gonorrhoeae</i> ATL_2011_01_17 | GCA_001026255.1 | ATQH01        |
| <i>Neisseria gonorrhoeae</i> ATL_2011_01-21 | GCA_001025595.1 | ATQI01        |
| <i>Neisseria gonorrhoeae</i> ATL_2011_01-25 | GCA_001025985.1 | ATQJ01        |
| <i>Neisseria gonorrhoeae</i> ATL_2011_05-08 | GCA_001026305.1 | ATQK01        |
| <i>Neisseria gonorrhoeae</i> ATL_2011_05-13 | GCA_001025615.1 | ATQL01        |
| <i>Neisseria gonorrhoeae</i> CH811          | GCA_001026555.1 | ATKL01        |
| <i>Neisseria gonorrhoeae</i> DGI18          | GCA_000156795.1 | ABZH01        |
| <i>Neisseria gonorrhoeae</i> DGI2           | GCA_000159935.1 | ACIG01        |
| <i>Neisseria gonorrhoeae</i> F62            | GCA_000163535.1 | ADAA01        |
| <i>Neisseria gonorrhoeae</i> FA 1090        | GCA_000006845.1 | NC_002946.2   |
| <i>Neisseria gonorrhoeae</i> FA19           | GCA_001047225.1 | NZ_CP012026.1 |
| <i>Neisseria gonorrhoeae</i> FDAARGOS_204   | GCA_002073535.1 | NZ_CP020415.1 |
| <i>Neisseria gonorrhoeae</i> FDAARGOS_205   | GCA_002073615.1 | MBCP01        |
| <i>Neisseria gonorrhoeae</i> FDAARGOS_207   | GCA_002073655.1 | NZ_CP020419.1 |
| <i>Neisseria gonorrhoeae</i> GC1-182        | GCA_001026545.1 | ATPD01        |
| <i>Neisseria gonorrhoeae</i> GCGS001        | GCA_001158945.1 | CQOO01        |
| <i>Neisseria gonorrhoeae</i> GCGS002        | GCA_001124565.1 | CQLO01        |
| <i>Neisseria gonorrhoeae</i> GCGS004        | GCA_001103845.1 | CQJL01        |
| <i>Neisseria gonorrhoeae</i> GCGS005        | GCA_001084085.1 | CQOF01        |
| <i>Neisseria gonorrhoeae</i> GCGS006        | GCA_001128365.1 | CQLM01        |
| <i>Neisseria gonorrhoeae</i> GCGS009        | GCA_001099005.1 | CQJO01        |
| <i>Neisseria gonorrhoeae</i> GCGS017        | GCA_001131645.1 | CQIC01        |
| <i>Neisseria gonorrhoeae</i> GCGS019        | GCA_001162285.1 | CQOE01        |
| <i>Neisseria gonorrhoeae</i> GCGS022        | GCA_001103565.1 | CQIP01        |
| <i>Neisseria gonorrhoeae</i> GCGS025        | GCA_001096365.1 | CQKE01        |
| <i>Neisseria gonorrhoeae</i> GCGS027        | GCA_001116825.1 | CQNY01        |
| <i>Neisseria gonorrhoeae</i> GCGS029        | GCA_001154265.1 | CQNA01        |
| <i>Neisseria gonorrhoeae</i> GCGS031        | GCA_001161025.1 | CQOY01        |
| <i>Neisseria gonorrhoeae</i> GCGS033        | GCA_001355095.1 | CFMC01        |
| <i>Neisseria gonorrhoeae</i> GCGS034        | GCA_001146625.1 | CQLT01        |
| <i>Neisseria gonorrhoeae</i> GCGS035        | GCA_001088485.1 | CQKA01        |
| <i>Neisseria gonorrhoeae</i> GCGS036        | GCA_001130625.1 | CQLA01        |
| <i>Neisseria gonorrhoeae</i> GCGS040        | GCA_001083925.1 | CQLY01        |
| <i>Neisseria gonorrhoeae</i> GCGS041        | GCA_001171665.1 | CQHM01        |
| <i>Neisseria gonorrhoeae</i> GCGS058        | GCA_001150905.1 | CQKG01        |
| <i>Neisseria gonorrhoeae</i> GCGS060        | GCA_001162645.1 | CQLX01        |
| <i>Neisseria gonorrhoeae</i> GCGS077        | GCA_001145045.1 | CQNB01        |
| <i>Neisseria gonorrhoeae</i> GCGS083        | GCA_001147965.1 | CQKQ01        |
| <i>Neisseria gonorrhoeae</i> GCGS084        | GCA_001103805.1 | CQNZ01        |
| <i>Neisseria gonorrhoeae</i> GCGS086        | GCA_001106145.1 | CQMJ01        |
| <i>Neisseria gonorrhoeae</i> GCGS089        | GCA_001168105.1 | CQID01        |
| <i>Neisseria gonorrhoeae</i> GCGS099        | GCA_001165845.1 | CQMR01        |

|                                             |                 |             |
|---------------------------------------------|-----------------|-------------|
| <i>Neisseria gonorrhoeae</i> GCGS104        | GCA_001354755.1 | CFMA01      |
| <i>Neisseria gonorrhoeae</i> GCGS109        | GCA_001172285.1 | CQKH01      |
| <i>Neisseria gonorrhoeae</i> GCGS113        | GCA_001164185.1 | CQNI01      |
| <i>Neisseria gonorrhoeae</i> GCGS115        | GCA_001100365.1 | CQLD01      |
| <i>Neisseria gonorrhoeae</i> GCGS116        | GCA_001145225.1 | CQOD01      |
| <i>Neisseria gonorrhoeae</i> GCGS117        | GCA_001095225.1 | CQKP01      |
| <i>Neisseria gonorrhoeae</i> GCGS118        | GCA_001131965.1 | CQNL01      |
| <i>Neisseria gonorrhoeae</i> GCGS120        | GCA_001355175.1 | CIFS01      |
| <i>Neisseria gonorrhoeae</i> GCGS126        | GCA_001129885.1 | CQJX01      |
| <i>Neisseria gonorrhoeae</i> GCGS128        | GCA_001112845.1 | CQKW01      |
| <i>Neisseria gonorrhoeae</i> GCGS142        | GCA_001156005.1 | CQMS01      |
| <i>Neisseria gonorrhoeae</i> GCGS155        | GCA_001355015.1 | CHDW01      |
| <i>Neisseria gonorrhoeae</i> GCGS163        | GCA_001116105.1 | CQKY01      |
| <i>Neisseria gonorrhoeae</i> GCGS165        | GCA_001151205.1 | CQJQ01      |
| <i>Neisseria gonorrhoeae</i> GCGS168        | GCA_001355195.1 | CGDD01      |
| <i>Neisseria gonorrhoeae</i> GCGS170        | GCA_001355335.1 | CFLX01      |
| <i>Neisseria gonorrhoeae</i> GCGS171        | GCA_001102165.1 | CQLF01      |
| <i>Neisseria gonorrhoeae</i> GCGS174        | GCA_001170125.1 | CQOT01      |
| <i>Neisseria gonorrhoeae</i> GCGS176        | GCA_001143005.1 | CQNJ01      |
| <i>Neisseria gonorrhoeae</i> GCGS180        | GCA_001133405.1 | CQOW01      |
| <i>Neisseria gonorrhoeae</i> GCGS188        | GCA_001171845.1 | CQLV01      |
| <i>Neisseria gonorrhoeae</i> GCGS189        | GCA_001161245.1 | CQOH01      |
| <i>Neisseria gonorrhoeae</i> GCGS190        | GCA_001355155.1 | CFSG01      |
| <i>Neisseria gonorrhoeae</i> GCGS191        | GCA_001129585.1 | CQLW01      |
| <i>Neisseria gonorrhoeae</i> GCGS202        | GCA_001085725.1 | CQJM01      |
| <i>Neisseria gonorrhoeae</i> GCGS203        | GCA_001156545.1 | CQKM01      |
| <i>Neisseria gonorrhoeae</i> GCGS205        | GCA_001120385.1 | CQJU01      |
| <i>Neisseria gonorrhoeae</i> GCGS208        | GCA_001125025.1 | CQKT01      |
| <i>Neisseria gonorrhoeae</i> GCGS210        | GCA_001088845.1 | CQJI01      |
| <i>Neisseria gonorrhoeae</i> GCGS215        | GCA_001087905.1 | CQME01      |
| <i>Neisseria gonorrhoeae</i> GCGS218        | GCA_001103185.1 | CQMZ01      |
| <i>Neisseria gonorrhoeae</i> GCGS222        | GCA_001151425.1 | CQLN01      |
| <i>Neisseria gonorrhoeae</i> GCGS227        | GCA_001099685.1 | CQKN01      |
| <i>Neisseria gonorrhoeae</i> GCGS228        | GCA_001099505.1 | CQMA01      |
| <i>Neisseria gonorrhoeae</i> GCGS229        | GCA_001319165.1 | CHZL01      |
| <i>Neisseria gonorrhoeae</i> GCGS233        | GCA_001132085.1 | CQIJ01      |
| <i>Neisseria gonorrhoeae</i> GCGS234        | GCA_001117665.1 | CQKL01      |
| <i>Neisseria gonorrhoeae</i> GCGS235        | GCA_001167285.1 | CQIK01      |
| <i>Neisseria gonorrhoeae</i> GCGS237        | GCA_001156065.1 | CQHY01      |
| <i>Neisseria gonorrhoeae</i> GCGS239        | GCA_001132185.1 | CQKF01      |
| <i>Neisseria gonorrhoeae</i> H15_353        | GCA_001563755.1 | LOIB01      |
| <i>Neisseria gonorrhoeae</i> m07.05         | GCA_000695445.1 | JFBB01      |
| <i>Neisseria gonorrhoeae</i> MIA_2011_02_02 | GCA_001025645.1 | ATQM01      |
| <i>Neisseria gonorrhoeae</i> MIA_2011_03-09 | GCA_001026315.1 | ATQN01      |
| <i>Neisseria gonorrhoeae</i> MIA_2011_03-10 | GCA_001025995.1 | ATQO01      |
| <i>Neisseria gonorrhoeae</i> MIA_2011_05-10 | GCA_001026335.1 | ATQP01      |
| <i>Neisseria gonorrhoeae</i> MIA_2011_05-15 | GCA_001025655.1 | ATQQ01      |
| <i>Neisseria gonorrhoeae</i> MIA_2011_05-16 | GCA_001026025.1 | ATQR01      |
| <i>Neisseria gonorrhoeae</i> MS11           | GCA_000156855.2 | NC_022240.1 |
| <i>Neisseria gonorrhoeae</i> MU_NG1         | GCA_001026385.1 | ATQV01      |
| <i>Neisseria gonorrhoeae</i> MU_NG12        | GCA_001026105.1 | ATRC01      |
| <i>Neisseria gonorrhoeae</i> MU_NG14        | GCA_001026465.1 | ATRD01      |
| <i>Neisseria gonorrhoeae</i> MU_NG15        | GCA_001025715.1 | ATRE01      |
| <i>Neisseria gonorrhoeae</i> MU_NG17        | GCA_001026565.1 | ATRF01      |
| <i>Neisseria gonorrhoeae</i> MU_NG19        | GCA_001026625.1 | ATRH01      |
| <i>Neisseria gonorrhoeae</i> MU_NG20        | GCA_001026655.1 | ATRI01      |

|                                             |                 |               |
|---------------------------------------------|-----------------|---------------|
| <i>Neisseria gonorrhoeae</i> MU_NG21        | GCA_001026115.1 | ATRJ01        |
| <i>Neisseria gonorrhoeae</i> MU_NG23        | GCA_001026485.1 | ATRK01        |
| <i>Neisseria gonorrhoeae</i> MU_NG25        | GCA_001026645.1 | ATRL01        |
| <i>Neisseria gonorrhoeae</i> MU_NG26        | GCA_001026615.1 | ATRM01        |
| <i>Neisseria gonorrhoeae</i> MU_NG3         | GCA_001026395.1 | ATQW01        |
| <i>Neisseria gonorrhoeae</i> MU_NG4         | GCA_001025705.1 | ATQX01        |
| <i>Neisseria gonorrhoeae</i> MU_NG5         | GCA_001026065.1 | ATQY01        |
| <i>Neisseria gonorrhoeae</i> MU_NG6         | GCA_001026415.1 | ATQZ01        |
| <i>Neisseria gonorrhoeae</i> MU_NG8         | GCA_001026085.1 | ATRA01        |
| <i>Neisseria gonorrhoeae</i> MU_NG9         | GCA_001026405.1 | ATRB01        |
| <i>Neisseria gonorrhoeae</i> NCCP11945      | GCA_000020105.1 | NC_011035.1   |
| <i>Neisseria gonorrhoeae</i> NCTC13798      | GCA_900186875.1 | NZ_LT906440.1 |
| <i>Neisseria gonorrhoeae</i> NCTC13799      | GCA_900186935.1 | NZ_LT906437.1 |
| <i>Neisseria gonorrhoeae</i> NCTC13800      | GCA_900186915.1 | NZ_LT906472.1 |
| <i>Neisseria gonorrhoeae</i> NG_869         | GCA_001039435.1 | LFJW01        |
| <i>Neisseria gonorrhoeae</i> NGSJH1         | GCA_002080955.1 | NAGH01        |
| <i>Neisseria gonorrhoeae</i> NGSJH10        | GCA_002080825.1 | NAGO01        |
| <i>Neisseria gonorrhoeae</i> NGSJH11        | GCA_002080855.1 | NAGP01        |
| <i>Neisseria gonorrhoeae</i> NGSJH2         | GCA_002080715.1 | NAGI01        |
| <i>Neisseria gonorrhoeae</i> NGSJH4         | GCA_002080745.1 | NAGJ01        |
| <i>Neisseria gonorrhoeae</i> NGSJH5         | GCA_002080775.1 | NAGK01        |
| <i>Neisseria gonorrhoeae</i> NOR_2011_03-06 | GCA_001025685.1 | ATQS01        |
| <i>Neisseria gonorrhoeae</i> NYC_2011_05_07 | GCA_001026345.1 | ATQT01        |
| <i>Neisseria gonorrhoeae</i> NYC_2011_05_13 | GCA_001026035.1 | ATQU01        |
| <i>Neisseria gonorrhoeae</i> PID1           | GCA_000156895.1 | ABZM01        |
| <i>Neisseria gonorrhoeae</i> PID18          | GCA_000156875.1 | ABZL01        |
| <i>Neisseria gonorrhoeae</i> PID24-1        | GCA_000156915.1 | ABZN01        |
| <i>Neisseria gonorrhoeae</i> PID332         | GCA_000156935.1 | ABZO01        |
| <i>Neisseria gonorrhoeae</i> SK-92-679      | GCA_000156955.1 | ABZP01        |
| <i>Neisseria gonorrhoeae</i> SK-93-1035     | GCA_000156975.1 | ABZQ01        |
| <i>Neisseria gonorrhoeae</i> SK12684        | GCA_001026535.1 | ATPK01        |
| <i>Neisseria gonorrhoeae</i> SK14515        | GCA_001025485.1 | ATPM01        |
| <i>Neisseria gonorrhoeae</i> SK15454        | GCA_001025805.1 | ATPN01        |
| <i>Neisseria gonorrhoeae</i> SK16942        | GCA_001025835.1 | ATPP01        |
| <i>Neisseria gonorrhoeae</i> SK17973        | GCA_001025475.1 | ATPQ01        |
| <i>Neisseria gonorrhoeae</i> SK1902         | GCA_001026145.1 | ATPF01        |
| <i>Neisseria gonorrhoeae</i> SK22871        | GCA_001025525.1 | ATPR01        |
| <i>Neisseria gonorrhoeae</i> SK23020        | GCA_001025535.1 | ATPS01        |
| <i>Neisseria gonorrhoeae</i> SK28355        | GCA_001026185.1 | ATPU01        |
| <i>Neisseria gonorrhoeae</i> SK29344        | GCA_001026175.1 | ATPV01        |
| <i>Neisseria gonorrhoeae</i> SK29471        | GCA_001025865.1 | ATPW01        |
| <i>Neisseria gonorrhoeae</i> SK32402        | GCA_001025545.1 | ATPX01        |
| <i>Neisseria gonorrhoeae</i> SK33414        | GCA_001025875.1 | ATPY01        |
| <i>Neisseria gonorrhoeae</i> SK36809        | GCA_001026225.1 | ATPZ01        |
| <i>Neisseria gonorrhoeae</i> SK39420        | GCA_001026245.1 | ATQA01        |
| <i>Neisseria gonorrhoeae</i> SK6987         | GCA_001026165.1 | ATPG01        |
| <i>Neisseria gonorrhoeae</i> SK708          | GCA_001025745.1 | ATPE01        |
| <i>Neisseria gonorrhoeae</i> SK7461         | GCA_001025465.1 | ATPH01        |
| <i>Neisseria gonorrhoeae</i> SK7842         | GCA_001025765.1 | ATPI01        |
| <i>Neisseria gonorrhoeae</i> SK8976         | GCA_001025775.1 | ATPJ01        |
| <i>Neisseria gonorrhoeae</i> USO_DK11-24    | GCA_001859135.1 | MBBI01        |
| <i>Neisseria gonorrhoeae</i> USO_DK12-21    | GCA_001859405.1 | MBBV01        |
| <i>Neisseria gonorrhoeae</i> USO_DK12-38    | GCA_001859425.1 | MBBW01        |
| <i>Neisseria gonorrhoeae</i> USO_G09-145    | GCA_001858745.1 | MBAO01        |
| <i>Neisseria gonorrhoeae</i> USO_GC3828     | GCA_001859565.1 | MBCD01        |
| <i>Neisseria gonorrhoeae</i> USO_GC3831     | GCA_001859585.1 | MBCE01        |

|                                           |                 |        |
|-------------------------------------------|-----------------|--------|
| <i>Neisseria gonorrhoeae</i> USO_GC3868   | GCA_001859705.1 | MBCK01 |
| <i>Neisseria gonorrhoeae</i> USO_GR13-015 | GCA_001859945.1 | MBCW01 |
| <i>Neisseria gonorrhoeae</i> USO_IE11027  | GCA_001859185.1 | MBBK01 |
| <i>Neisseria gonorrhoeae</i> USO_IE11068  | GCA_001859205.1 | MBBL01 |
| <i>Neisseria gonorrhoeae</i> USO_IE12-079 | GCA_001859545.1 | MBCC01 |
| <i>Neisseria gonorrhoeae</i> USO_NL09-008 | GCA_001858695.1 | MBAM01 |
| <i>Neisseria gonorrhoeae</i> USO_NL10-083 | GCA_001859005.1 | MBBB01 |
| <i>Neisseria gonorrhoeae</i> USO_NO10-026 | GCA_001858855.1 | MBAU01 |
| <i>Neisseria gonorrhoeae</i> USO_SI10-010 | GCA_001858935.1 | MBAY01 |
| <i>Neisseria gonorrhoeae</i> USO_SI12-044 | GCA_001859835.1 | MBCR01 |
| <i>Neisseria gonorrhoeae</i> USO_SP09-062 | GCA_001858665.1 | MBAL01 |
| <i>Neisseria gonorrhoeae</i> USO_UK121470 | GCA_001859875.1 | MBCT01 |

---
